# Supplementary material for: The m.7510T>C mutation: Hearing impairment and a complex neurologic phenotype
Source: PubMed Central journal article supplement (PMC5745241; doi:10.1002/brb3.859), 2017-11-19
Supplement: BRB3-7-e00859-s001.pdf [file BRB3-7-e00859-s001.pdf]

rCRS NC\_012920

H2a2a1

263

H2a2a

8860  
15326

H2a2

750

H2a

4769

H2

1438

H

2706  
7028

HV

14766

R0

73

11719

R

16189

R0+16189

8281d

8282d

8283d

8284d

8285d

8286d

8287d

8288d

8289d

B

16217

B4

16261

B4+16261

5465

9123

B4a

10238

B4a1

146

6719

12239

15746

B4a1a

14449

B4a1a3

16223

B4a1a3a

7510

POP1

3010

H1

183

16468

H1ar

182

7510

14344

16311

S258

16293

H24

3333

H24a

5261

16234

H24a1

186A

7510

LMG309

14872

H13

2259

H13a

4745

H13a1

13680

H13a1a

7337

13326

H13a1a1

709

8842

16261

16311

H13a1a1d

10101

H13a1a1d1

7510

11337

T107

KEY

Local private mutation

Global private mutation

@ = assumed back mutation  
or missing mutation

Heteroplasmic mutation
